# Supplementary material for: Production loss and sick leave caused by antibiotic resistance: a register-based cohort study
Source: PubMed Central journal article supplement (PMC8932015; doi:10.1186/s12889-022-12947-x), 2022-03-17
Supplement: 12889_2022_12947_MOESM1_ESM.pdf [file 12889_2022_12947_MOESM1_ESM.pdf]

# Production loss and sick leave caused by antibacterial resistance – a register-based cohort study

Sofie Larsson, Mikael Svensson, Anders Ternhag

## Online Appendix

### Tables

- Table A1** Akaike Information Criterion (AIC) and Schwarz’s Bayesian Information Criterion (BIC) to test the relative goodness-of-fit of TPM model specifications
- Table A2** Sensitivity analysis: First and second part of TPM on total days of LTSL
- Table A3** Sensitivity analysis: Marginal effects from TPM on total days of LTSL
- Table A4** Sensitivity analysis: First and second part of TPM with Poisson regression on net days of LTSL
- Table A5** Sensitivity analysis: Marginal effects from TPM with Poisson regression on net days of LTSL

**Table A1 Akaike Information Criterion (AIC) and Schwarz's Bayesian Information Criterion (BIC) to test the relative goodness-of-fit of TPM model specifications**

| <b>TPM model specifications</b> | <b>Obs.</b> | <b>AIC</b> | <b>BIC</b> |
|---------------------------------|-------------|------------|------------|
| Model 1                         | 704,115     | 1,036,683  | 1,036,798  |
| Model 2                         | 704,115     | 1,024,211  | 1,024,349  |
| Model 3                         | 704,115     | 1,023,357  | 1,023,518  |
| Model 4                         | 704,115     | 1,016,693  | 1,016,922  |

**Table A2 Sensitivity analysis: First and second part of TPM on total days of LTSL**

|                                             | SA: TPM<br>Model 5        | SA: TPM<br>Model 6        | SA: TPM<br>Model 7        | SA: TPM<br>Model 8        |
|---------------------------------------------|---------------------------|---------------------------|---------------------------|---------------------------|
| <b>Part 1: Odds ratio (OR)</b>              |                           |                           |                           |                           |
| Antibiotic resistance                       | 1.46***<br>(0.06)         | 1.51***<br>(0.06)         | 1.43***<br>(0.06)         | 2.23***<br>(0.10)         |
| Age                                         | 1.01***<br>(0.00)         | 1.01***<br>(0.00)         | 1.01***<br>(0.00)         | 1.01***<br>(0.00)         |
| Female sex                                  | 1.04**<br>(0.01)          | 1.02<br>(0.01)            | 1.02<br>(0.01)            | 1.09***<br>(0.01)         |
| Year                                        | 0.97***<br>(0.00)         | 0.97***<br>(0.00)         | 0.97***<br>(0.00)         | 0.97***<br>(0.00)         |
| Charlson index                              |                           | 0.86***<br>(0.00)         | 0.86***<br>(0.00)         | 0.87***<br>(0.00)         |
| At least two infections at<br>once          |                           |                           | 2.01***<br>(0.06)         | 0.93*<br>(0.03)           |
| Bloodstream infection                       |                           |                           |                           | 2.74***<br>(0.06)         |
| Pneumonia                                   |                           |                           |                           | 2.75***<br>(0.06)         |
| Skin and soft tissue<br>infection           |                           |                           |                           | 1.65***<br>(0.04)         |
| Urinary tract infection<br>(reference case) |                           |                           |                           | –                         |
| Constant                                    | 2.18e+25***<br>(1.82e+26) | 1.10e+28***<br>(9.09e+28) | 3.82e+28***<br>(3.17e+29) | 2.36e+24***<br>(1.96e+25) |
| <b>Part 2: Incidence Rate Ratios (IRR)</b>  |                           |                           |                           |                           |
| Antibiotic resistance                       | 1.81***<br>(0.12)         | 1.70***<br>(0.11)         | 1.68***<br>(0.11)         | 1.66***<br>(0.12)         |
| Age                                         | 1.02***<br>(0.00)         | 1.01***<br>(0.00)         | 1.01***<br>(0.00)         | 1.01***<br>(0.00)         |
| Female sex                                  | 0.92***<br>(0.02)         | 0.93***<br>(0.02)         | 0.93***<br>(0.02)         | 0.95**<br>(0.02)          |
| Year                                        | 1.04***<br>(0.01)         | 1.05***<br>(0.01)         | 1.05***<br>(0.01)         | 1.04***<br>(0.01)         |
| Charlson index                              |                           | 1.28***<br>(0.01)         | 1.28***<br>(0.01)         | 1.28***<br>(0.01)         |
| At least two infections at<br>once          |                           |                           | 1.29***<br>(0.05)         | 1.27***<br>(0.07)         |
| Bloodstream infection                       |                           |                           |                           | 1.06<br>(0.04)            |
| Pneumonia                                   |                           |                           |                           | 0.84***<br>(0.04)         |
| Skin and soft tissue<br>infection           |                           |                           |                           | 1.03<br>(0.05)            |
| Urinary tract infection<br>(reference case) |                           |                           |                           | –                         |
| Constant                                    | 0.00***<br>(0.00)         | 0.00***<br>(0.00)         | 0.00***<br>(0.00)         | 0.00***<br>(0.00)         |
| Observations                                | 704,115                   | 704,115                   | 704,115                   | 704,115                   |

Exponentiated coefficients; Standard errors in parentheses

First part: Logistic regression, Second part: Negative Binomial regression. SA=Sensitivity analysis

\*  $p < 0.05$ , \*\*  $p < 0.01$ , \*\*\*  $p < 0.001$

**Table A3 Sensitivity analysis: Marginal effects from TPM on total days of LTSL**

|                                             | SA: TPM<br>Model 5 | SA: TPM<br>Model 6 | SA: TPM<br>Model 7 | SA: TPM<br>Model 8 |
|---------------------------------------------|--------------------|--------------------|--------------------|--------------------|
| Antibiotic resistance                       | 7.22**<br>(0.58)   | 7.06**<br>(0.61)   | 6.58**<br>(0.62)   | 9.66**<br>(0.64)   |
| Age                                         | 0.19**<br>(0.01)   | 0.17**<br>(0.01)   | 0.17**<br>(0.01)   | 0.15**<br>(0.01)   |
| Female sex                                  | -0.41*<br>(0.20)   | -0.44*<br>(0.19)   | -0.41*<br>(0.19)   | 0.16<br>(0.19)     |
| Year                                        | 0.06<br>(0.07)     | 0.13*<br>(0.06)    | 0.12<br>(0.06)     | 0.13*<br>(0.06)    |
| Charlson index                              |                    | 0.86**<br>(0.08)   | 0.83**<br>(0.08)   | 0.89**<br>(0.08)   |
| At least two infections at<br>once          |                    |                    | 7.01**<br>(0.39)   | 1.33**<br>(0.51)   |
| Bloodstream infection                       |                    |                    |                    | 7.64**<br>(0.38)   |
| Pneumonia                                   |                    |                    |                    | 5.80**<br>(0.39)   |
| Skin and soft tissue<br>infection           |                    |                    |                    | 3.81**<br>(0.40)   |
| Urinary tract infection<br>(reference case) |                    |                    |                    | —                  |
| Observations                                | 704,115            | 704,115            | 704,115            | 704,115            |

Standard errors in parentheses. SA=Sensitivity analysis

\*  $p < 0.05$ , \*\*  $p < 0.01$ , \*\*\*  $p < 0.001$

**Table A4 Sensitivity analysis: First and second part of TPM with Poisson regression on net days of LTSL**

|                                            | SA: TPM<br>Model 9        | SA: TPM<br>Model 10       | SA: TPM<br>Model 11       | SA: TPM<br>Model 12       |
|--------------------------------------------|---------------------------|---------------------------|---------------------------|---------------------------|
| <b>Part 1: Odds ratio (OR)</b>             |                           |                           |                           |                           |
| Antibiotic resistance                      | 1.46***<br>(0.06)         | 1.51***<br>(0.06)         | 1.43***<br>(0.06)         | 2.23***<br>(0.10)         |
| Age                                        | 1.01***<br>(0.00)         | 1.01***<br>(0.00)         | 1.01***<br>(0.00)         | 1.01***<br>(0.00)         |
| Female                                     | 1.04**<br>(0.01)          | 1.02<br>(0.01)            | 1.02<br>(0.01)            | 1.09***<br>(0.01)         |
| Year                                       | 0.97***<br>(0.00)         | 0.97***<br>(0.00)         | 0.97***<br>(0.00)         | 0.97***<br>(0.00)         |
| Charlson index                             |                           | 0.86***<br>(0.00)         | 0.86***<br>(0.00)         | 0.87***<br>(0.00)         |
| At least 2 simultaneous infections         |                           |                           | 2.01***<br>(0.06)         | 0.93*<br>(0.03)           |
| Bloodstream infection                      |                           |                           |                           | 2.74***<br>(0.06)         |
| Pneumonia                                  |                           |                           |                           | 2.75***<br>(0.06)         |
| Skin and soft tissue infection             |                           |                           |                           | 1.65***<br>(0.04)         |
| Urinary tract infection (reference case)   |                           |                           |                           | —                         |
| Constant                                   | 2.18e+25***<br>(1.82e+26) | 1.10e+28***<br>(9.09e+28) | 3.82e+28***<br>(3.17e+29) | 2.36e+24***<br>(1.96e+25) |
| <b>Part 2: Incidence Rate Ratios (IRR)</b> |                           |                           |                           |                           |
| Antibiotic resistance                      | 1.95***<br>(0.14)         | 1.73***<br>(0.12)         | 1.69***<br>(0.12)         | 1.68***<br>(0.13)         |
| Age                                        | 1.02***<br>(0.00)         | 1.01***<br>(0.00)         | 1.01***<br>(0.00)         | 1.01***<br>(0.00)         |
| Female                                     | 0.88***<br>(0.02)         | 0.88***<br>(0.02)         | 0.89***<br>(0.02)         | 0.91***<br>(0.02)         |
| Year                                       | 1.04***<br>(0.01)         | 1.05***<br>(0.01)         | 1.04***<br>(0.01)         | 1.04***<br>(0.01)         |
| Charlson index                             |                           | 1.22***<br>(0.01)         | 1.22***<br>(0.01)         | 1.22***<br>(0.01)         |
| At least 2 simultaneous infections         |                           |                           | 1.30***<br>(0.06)         | 1.19**<br>(0.08)          |
| Bloodstream infection                      |                           |                           |                           | 1.11*<br>(0.05)           |
| Pneumonia                                  |                           |                           |                           | 0.83***<br>(0.04)         |
| Skin and soft tissue infection             |                           |                           |                           | 1.13*<br>(0.06)           |
| Urinary tract infection (reference case)   |                           |                           |                           | —                         |
| Constant                                   | 0.00***<br>(0.00)         | 0.00***<br>(0.00)         | 0.00***<br>(0.00)         | 0.00***<br>(0.00)         |
| Observations                               | 704,115                   | 704,115                   | 704,115                   | 704,115                   |

Exponentiated coefficients; Standard errors in parentheses

First part: Logistic regression, Second part: Poisson regression. SA=Sensitivity analysis

\*  $p < 0.05$ , \*\*  $p < 0.01$ , \*\*\*  $p < 0.001$

**Table A5 Sensitivity analysis: Marginal effects from TPM with Poisson regression on net days of LTSL**

|                                             | SA: TPM<br>Model 9 | SA: TPM<br>Model 10 | SA: TPM<br>Model 11 | SA: TPM<br>Model 12 |
|---------------------------------------------|--------------------|---------------------|---------------------|---------------------|
| Antibiotic resistance                       | 5.93***<br>(0.47)  | 5.33***<br>(0.47)   | 4.90***<br>(0.47)   | 7.18***<br>(0.49)   |
| Age                                         | 0.15***<br>(0.01)  | 0.13***<br>(0.01)   | 0.13***<br>(0.01)   | 0.11***<br>(0.01)   |
| Female                                      | -0.59***<br>(0.17) | -0.62***<br>(0.16)  | -0.59***<br>(0.16)  | -0.14<br>(0.16)     |
| Year                                        | 0.06<br>(0.06)     | 0.08<br>(0.05)      | 0.07<br>(0.05)      | 0.06<br>(0.06)      |
| Charlson index                              |                    | 0.39***<br>(0.04)   | 0.37***<br>(0.04)   | 0.40***<br>(0.04)   |
| At least 2 simultaneous<br>infections       |                    |                     | 5.19***<br>(0.33)   | 0.63<br>(0.42)      |
| Bloodstream infection                       |                    |                     |                     | 5.87***<br>(0.31)   |
| Pneumonia                                   |                    |                     |                     | 4.20***<br>(0.33)   |
| Skin and soft tissue<br>infection           |                    |                     |                     | 3.32***<br>(0.34)   |
| Urinary tract infection<br>(reference case) |                    |                     |                     | —                   |
| Observations                                | 704,115            | 704,115             | 704,115             | 704,115             |

Standard errors in parentheses

First part: Logistic regression, Second part: Poisson regression. SA=Sensitivity analysis

\*  $p < 0.05$ , \*\*  $p < 0.01$ , \*\*\*  $p < 0.001$
